# Supplementary material for: Differential Expression of Serum Extracellular Vesicle miRNAs in Multiple Sclerosis: Disease-Stage Specificity and Relevance to Pathophysiology
Source: MDPI journal article supplement (doi:10.3390/ijms23031664), 2022-01-31
Supplement: s1 [file s1]

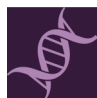

## Supplementary Material

### Methods

The validation of serum and CSF EV-rich fractions as collected by size exclusion chromatography was conducted using the following methods.

**Tunable resistive pulse sensing:** Pilot serum and CSF samples from healthy and hospitalized human subjects, respectively, were analyzed on a tunable resistive pulse sensing qNANO platform, following a standardized methodology [60] (Fig. S1A, B). Briefly, an NP100 membrane (Izon Science) was used, and the set-up calibrated using carboxylated particles (diameter = 110 nm). Size and concentration calibrations were performed using CPN100 standards at a concentration of  $10^{10}$  particles/ml. The EV concentration at each size category was determined using a two-points pressure method, with pressures ranging between 0.3–2 kPa. All samples were run in triplicates. Measurements were carried out by Nanotechnology.life laboratories, Loughborough University (Loughborough, UK).

**Transmission electron microscopy (TEM):** Isolated EVs (5  $\mu$ l) were applied onto a freshly glow discharged carbon film grid for 2 min, then washed with distilled de-ionized water and air dried. Negative staining was achieved by a double incubation with 5  $\mu$ l of 1% uranyl acetate. Samples were viewed on a JEOL JEM-1400 TEM with an accelerating voltage of 120 kV. Images were collected using an EMSIS Xarosa digital camera running Radius software (Fig. S1C, D). The procedure was carried out at the Core Biotechnology Services Electron Microscopy Facility, University of Leicester (Leicester, UK).

**Western blotting:** Isolated EVs were lysed in radioimmunoprecipitation assay (RIPA) buffer containing protease inhibitor (cOmplete Mini, Merck). A Pierce BCA Protein Assay (Thermo Fischer) was used to assess protein concentration of individual (Fig. S1E, F) and pooled SEC fractions. Lysates were resolved onto a 12% polyacrylamide precast gel (Criterion TGX, Bio-Rad) using 1x sodium dodecyl sulfate (SDS) running buffer. Samples were then transferred onto a polyvinylidene difluoride (PVDF) membrane for 7 min at 25 V using the Trans-Blot Turbo Transfer system (Bio-Rad). Membranes were rinsed with PBS 1% Tween (PBS-T) and blocked with PBS-T containing 5% non-fat milk powder for 1 h at room temperature before overnight incubation with primary antibody at 4°C. Primary antibodies against the following EV marker proteins were used and at the dilutions indicated: Alix (1:5000, ab186429, Abcam), CD9 (1:2000, ab92726, Abcam), Flotilin-1 (1:1000, 610820, BD Transduction Laboratories), and CD-81 (1:250, MAB4615, R&D Systems). Membranes were then washed in PBS-T (3x 20 min), incubated for 1 h at room temperature with the appropriate horseradish peroxidase-conjugated secondary antibody (1:1000), and finally washed in PBS-T (3x 20 min). Lastly, membranes were incubated with detection solvent (Clarity ECL Western Detection System, Bio-Rad) and images were acquired using Chemidoc MP Imaging system (Bio-Rad) (Fig. S1G, H).

**LDL-cholesterol assay:** The extent of presence of contaminating low-density lipoproteins (LDL) in serum EV preparations was assessed by running 2.5  $\mu$ l EV-rich fractions in the LDL-cholesterol (LDL-C) Assay Kit (Elabscience), according to the manufacturer's instructions (Fig. S1I).

60. Vogel, R.; Coumans, F.A.W.; Maltesen, R.G.; Böing, A.N.; Bonnington, K.E.; Broekman, M.L.; Broom, M.F.; Buzás, E.I.; Christiansen, G.; Hajji, N.; et al. A standardized method to determine the concentration of extracellular vesicles using tunable resistive pulse sensing. *J. Extracell. Vesicles* **2016**, *5*, 31242. <https://doi.org/10.3402/jev.v5.31242>

## Results

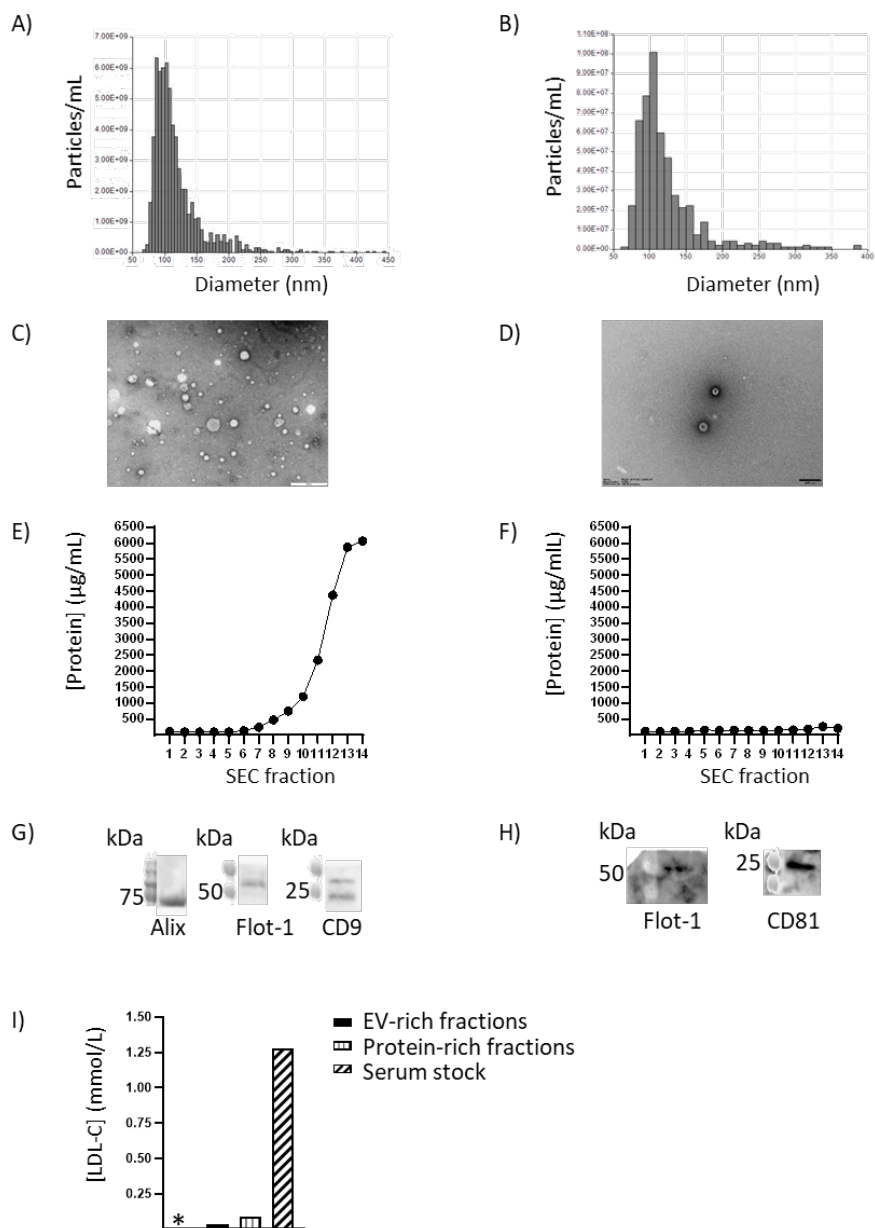

Figure S1. Validation of SEC-isolated serum and CSF EVs. (A, B) TRPS profile of a representative (A) serum EV-rich fraction (concentration:  $6.37 \times 10^{10}$  particles/mL, mean size: 120 nm) and (B) CSF EV-rich fraction (concentration:  $1.43 \times 10^9$  particles/mL, mean size: 127 nm). (C, D) Representative TEM image of (C) serum EVs and (D) CSF EVs; scale bar 200 nm. (E, F) Total protein quantification of individual SEC fractions (1-14) of (E) serum EVs and (F) CSF EVs. (G, H) Western blotting of (G) serum EV-rich fractions for the EV-specific protein markers Alix (75 kDa), Flotilin-1 (47 kDa), and CD9 (22 kDa), 40 µg protein per marker, and of (H) CSF EV-rich fractions for the EV-specific protein markers Flotilin-1 (47 kDa) and CD81 (25 kDa), 6 µg protein per marker. (I) LDL-C concentration for early fractions (1-5), EV-rich fractions (6-10), protein-rich fractions (11-15), and serum stock; \* LDL-C levels in the early fractions were below detection threshold.

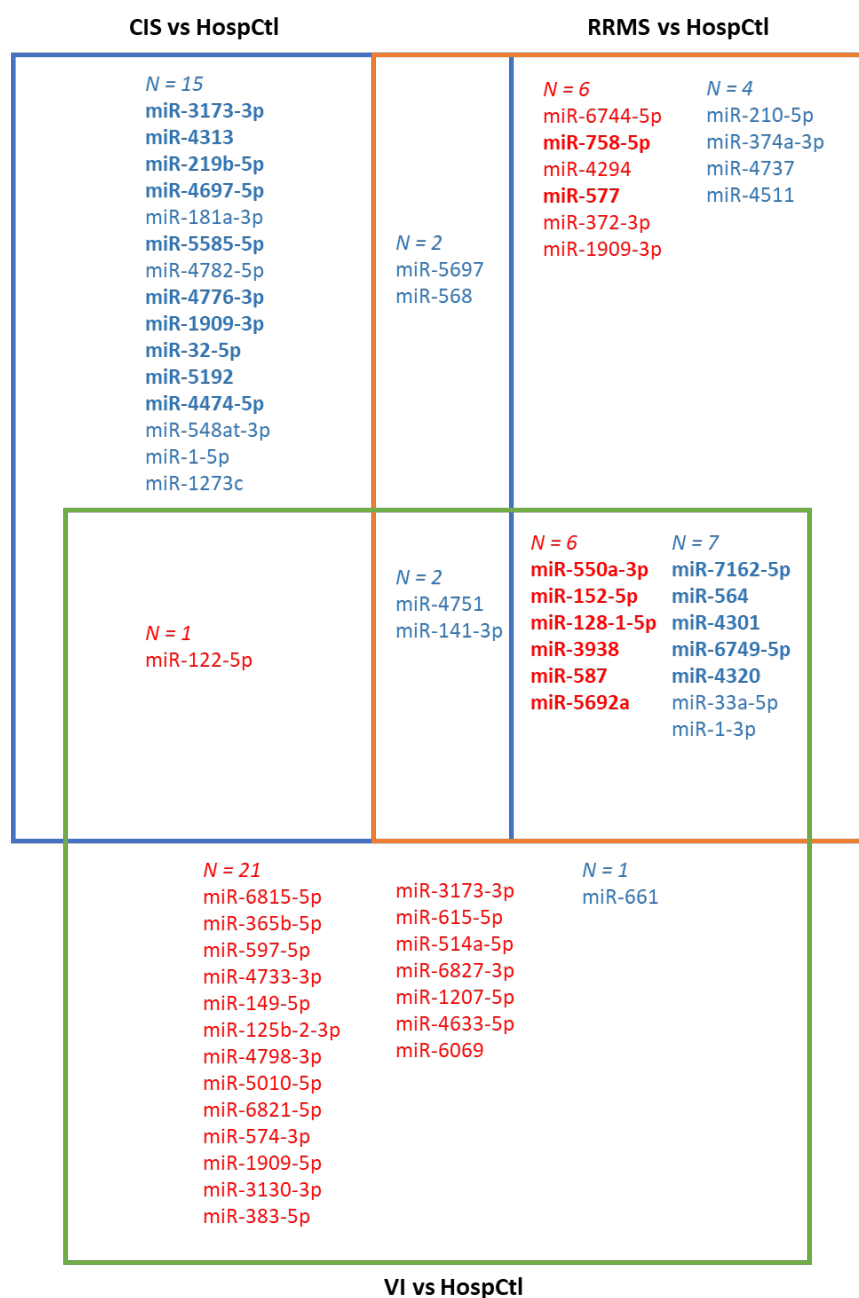

Figure S2. Venn diagram depicting the findings of pair-wise differential expression analysis (DEA) ( $p < 0.01$ ,  $\log_2$  fold change  $\geq 1$  or  $\leq -1$ ) of serum EV miRNomes in different subject groups. As a first step DEA was conducted for CIS vs HospCtl, RRMS vs HospCtl, and VI vs HospCtl. EV miRNAs indicated in blue were down-regulated in the corresponding disease state(s) relative to HospCtl, and miRNAs indicated in red were up-regulated in the corresponding disease state(s) relative to HospCtl. Next, DEA was conducted for CIS vs RRMS. EV miRNAs indicated in blue and bold were down-regulated in RRMS relative to HospCtl and CIS, and miRNAs indicated in red and bold were up-regulated in RRMS relative to HospCtl and CIS. Therefore, 15 down-regulated miRNAs were CIS-remission-specific relative to HospCtl and RRMS-relapse, and 12 miRNAs (6 up-regulated and 6 down-regulated) were RRMS-relapse-specific relative to HospCtl and CIS-remission.

**Table S1.** Comparison between miRNA-Seq and RT-qPCR expression data for two RRMS-specific miRNAs

|                                     | hsa-miR-16-5p |        | hsa-miR-451a |        |
|-------------------------------------|---------------|--------|--------------|--------|
|                                     | CIS           | RRMS   | CIS          | RRMS   |
| miRNA-Seq CPM mean                  | 111182        | 219829 | 6627         | 14634  |
| ± SEM                               | 14949         | 58466  | 1188         | 4415   |
| Delta Cq mean                       | 5.2           | 3.7    | 3.0          | 2.7    |
| ± SEM                               | 0.20          | 0.24   | 0.19         | 0.21   |
| Spearman's $r$ CPM against Delta Cq | -0.60         | -0.78  | -0.54        | -0.83  |
| Pearson's $r$ p                     | 0.04          | 0.0009 | 0.07         | 0.0003 |
| miRNA-Seq F-test p                  | 0.01          |        | 0.007        |        |
| miRNA-Seq CPM t-test p              | 0.1           |        | 0.1          |        |
| Delta Cq t-test p                   | < 0.0001      |        | 0.3          |        |

CPM: normalized counts per million.  $r$ : Spearman rank-order correlation coefficient.

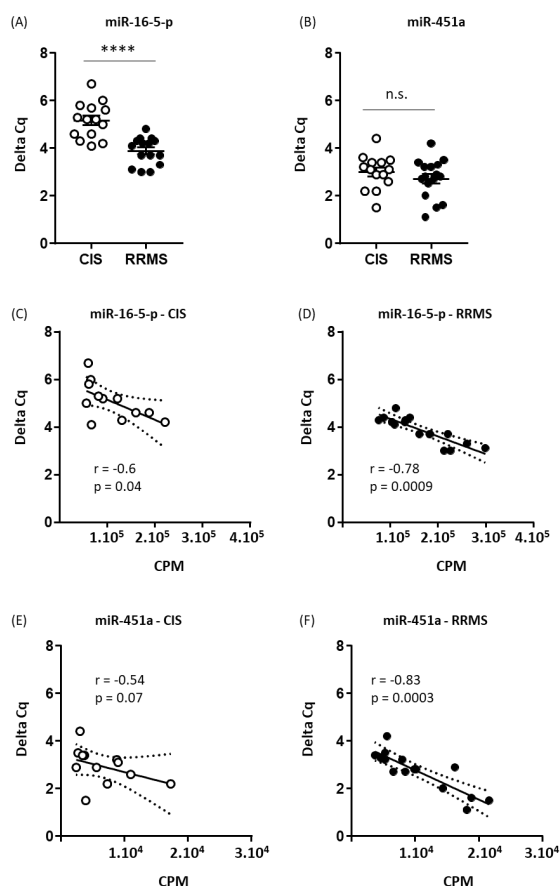

**Figure S3.** Validation of miRNA-Seq expression values using RT-qPCR. (A) miR-16-5p. (B) miR-451. \*\*\*\* $p < 0.0001$ , two-tailed unpaired Student's  $t$ -test. n.s. = not significant. Individual values, mean and  $\pm$  SEM values are shown. (C-F) Predictive association between miRNA-Seq normalized counts (CPM) and RT-PCR delta Cq values for miR-16-p within (C) CIS subjects and (D) RRMS subjects, and for miR-451a within (E) CIS subjects and (F) RRMS subjects. Scatter plots and the best-fit linear regression line ( $\pm$  95% confidence intervals) are given.

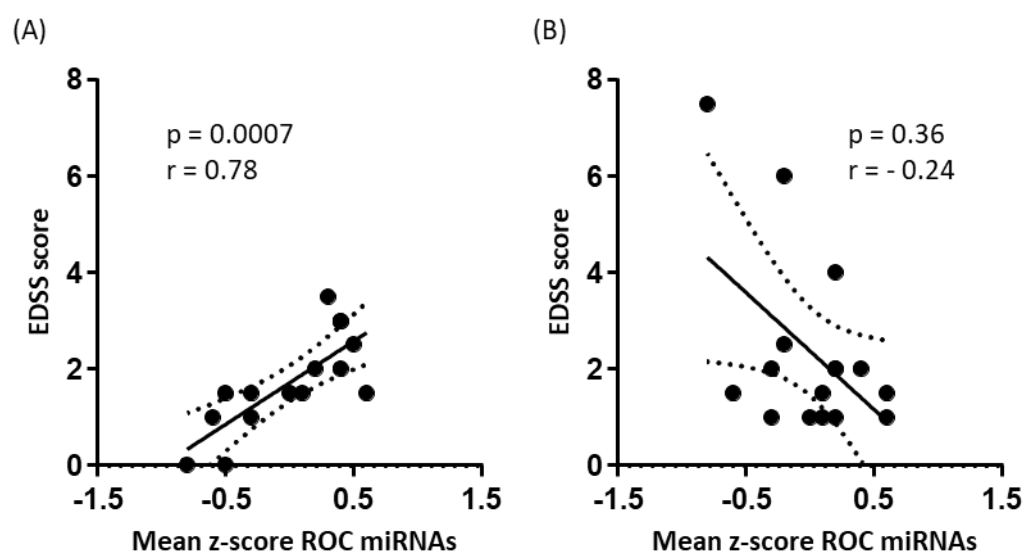

Figure S4. Predictive association between mean z-scores of the CIS-RRMS miRNA predictive panel and EDSS scores. Scatter plots and the best-fit linear regression line ( $\pm$  95% confidence intervals) are given for (A) mean z-score of the CIS-RRMS miRNA predictive panel and EDSS scores of CIS patients and (B) mean z-score of the CIS-RRMS miRNA predictive panel and EDSS scores of RRMS patients.

**Table S2.** Complete list of over-represented pathways identified for validated target genes of the RRMS-specific miRNAs

| Pathway                                                          | FDR                   | miRNAs          | Target transcripts                                                                                                                         |
|------------------------------------------------------------------|-----------------------|-----------------|--------------------------------------------------------------------------------------------------------------------------------------------|
| Vesicle-mediated transport                                       | $2.14 \times 10^{-8}$ | hsa-miR-16-5p   | <i>RAB9B, CAPZA2, DCTN5, GALNT1, RAB30, PPP6R3, RAB3IP, SBF1, TBC1D14, KIF2A, RACGAP1, KIF3B, KIF1B, TFRC, COL4A1</i>                      |
|                                                                  |                       | hsa-miR-6840-3p | <i>TRAPPC2, ACTR1A, FZD4, GNS, TBC1D24, GJC1, APOL1</i>                                                                                    |
|                                                                  |                       | hsa-miR-6811-3p | <i>RAB13, RAB30, PAFAH1B2, DENND6B</i>                                                                                                     |
|                                                                  |                       | hsa-miR-5192    | <i>CBL, CSNK1D, TBC1D13, SYT2, CALR</i>                                                                                                    |
|                                                                  |                       | hsa-miR-4476    | <i>RAB5B, ACTR2, PACSIN1</i>                                                                                                               |
|                                                                  |                       | hsa-miR-135b-5p | <i>RAB3GAP2</i>                                                                                                                            |
| Membrane trafficking (Vesicle-mediated transport)                | $2.14 \times 10^{-8}$ | hsa-miR-6840-3p | <i>TRAPPC2, ACTR1A, FZD4, GNS, TBC1D24, GJC1</i>                                                                                           |
|                                                                  |                       | hsa-miR-6811-3p | <i>RAB13, RAB30, PAFAH1B2, DENND6B</i>                                                                                                     |
|                                                                  |                       | hsa-miR-5192    | <i>CBL, CSNK1D, TBC1D13, SYT2</i>                                                                                                          |
|                                                                  |                       | hsa-miR-4476    | <i>RAB5B, ACTR2, PACSIN1</i>                                                                                                               |
|                                                                  |                       | hsa-miR-135b-5p | <i>RAB3GAP2</i>                                                                                                                            |
| Post-translational protein modification (Metabolism of proteins) | $1.87 \times 10^{-7}$ | hsa-miR-16-5p   | <i>RAB9B, CAPZA2, DCTN5, GALNT1, RAB30, PPP6R3, BIRC5, MAP3K7, SOCS2, NUP155, NCOR2, BRCA1, CUL3, FBXL20, B3GNT2, RAB23, GALNT7, ASXL1</i> |
|                                                                  |                       | hsa-miR-6840-3p | <i>TRAPPC2, ACTR1A, APOL1, MLEC, RCE1, SUMF2, GGCX, DCAF10, FOXK1, CPM</i>                                                                 |
|                                                                  |                       | hsa-miR-4476    | <i>RAB5B, PSMD11, PHC2, TFAP2A, USP12, IGFBP4</i>                                                                                          |
|                                                                  |                       | hsa-miR-1909-3p | <i>CANX, TFAP2B, SENP5, DPH2, WAC</i>                                                                                                      |
|                                                                  |                       | hsa-miR-5192    | <i>CSNK1D, CALR, ST6GAL2, RECK</i>                                                                                                         |

|                                                                                            |                    |                 |                                                                                                                        |
|--------------------------------------------------------------------------------------------|--------------------|-----------------|------------------------------------------------------------------------------------------------------------------------|
|                                                                                            |                    | hsa-miR-6811-3p | <i>RAB13, RAB30, KLHL21, PEX2</i>                                                                                      |
|                                                                                            |                    | hsa-miR-135b-5p | <i>THBS2</i>                                                                                                           |
| Signaling by Interleukins (Immune system)                                                  | $1.87 \times 10^7$ | hsa-miR-16-5p   | <i>BIRC5, MAP3K7, SOCS2, VEGFA, RPS6KA3, UBE2V1, BCL2, IRAK3, PIM1, HNRNP DL</i>                                       |
|                                                                                            |                    | hsa-miR-5192    | <i>CBL, SOD2, POU2F1, UBE2V1, STX3</i>                                                                                 |
|                                                                                            |                    | hsa-miR-4476    | <i>PSMD11, SOD2, CFL1, IFNLR1</i>                                                                                      |
|                                                                                            |                    | hsa-miR-1909-3p | <i>CANX, IRAK4, MCL1</i>                                                                                               |
|                                                                                            |                    | hsa-miR-6840-3p | <i>CRK, IL6R, STAT2</i>                                                                                                |
|                                                                                            |                    | hsa-miR-135b-5p | <i>STAT6</i>                                                                                                           |
|                                                                                            |                    | hsa-miR-6811-3p | <i>CCR2</i>                                                                                                            |
| Cytokine signalling in immune system (Immune system)                                       | $1.23 \times 10^6$ | hsa-miR-16-5p   | <i>BIRC5, MAP3K7, SOCS2, VEGFA, RPS6KA3, UBE2V1, BCL2, IRAK3, PIM1, HNRNP DL, NUP155, KRAS, CD44</i>                   |
|                                                                                            |                    | hsa-miR-5192    | <i>CBL, SOD2, POU2F1, UBE2V1, STX3, EDAR</i>                                                                           |
|                                                                                            |                    | hsa-miR-4476    | <i>PSMD11, SOD2, CFL1, IFNLR1</i>                                                                                      |
|                                                                                            |                    | hsa-miR-1909-3p | <i>CANX, IRAK4, MCL1</i>                                                                                               |
|                                                                                            |                    | hsa-miR-6840-3p | <i>CRK, IL6R, STAT2</i>                                                                                                |
|                                                                                            |                    | hsa-miR-6811-3p | <i>CCR2, PDE12</i>                                                                                                     |
|                                                                                            |                    | hsa-miR-135b-5p | <i>STAT6</i>                                                                                                           |
| RNA Polymerase II transcription (Transcription)                                            | $7.78 \times 10^6$ | hsa-miR-16-5p   | <i>BIRC5, VEGFA, NCOR2, BRCA1, KRAS, ANAPC16, TBL1XR1, CCND2, CHEK1, ZC3H 11A, CCNT2, TAF15, PIP4P1, PPM1D, ZNF691</i> |
|                                                                                            |                    | hsa-miR-4476    | <i>PSMD11, SOD2, PHC2, TFAP2A, TNRC6B, TXNIP, TFDP2, RNF111, CHTOP, GATA D2B, HDAC5, ZNF426</i>                        |
|                                                                                            |                    | hsa-miR-6811-3p | <i>AGO3, ANAPC16, ZNF716, ZNF770, ZNF490, ZNF154, ZNF175</i>                                                           |
|                                                                                            |                    | hsa-miR-6840-3p | <i>SKIL, OPRK1, INTS3, ZNF100, ZNF716, ZNF589</i>                                                                      |
|                                                                                            |                    | hsa-miR-5192    | <i>SOD2, POU2F1, E2F6, CCND2, ZC3H11A, FANCC</i>                                                                       |
|                                                                                            |                    | hsa-miR-135b-5p | <i>TXNIP</i>                                                                                                           |
|                                                                                            |                    | hsa-miR-1909-3p | <i>TFAP2B</i>                                                                                                          |
| Ca <sup>2+</sup> pathway (Signal transduction - Signaling by Wnt)                          | $1.15 \times 10^5$ | hsa-miR-16-5p   | <i>MAP3K7, KRAS</i>                                                                                                    |
|                                                                                            |                    | hsa-miR-4476    | <i>TNRC6B</i>                                                                                                          |
|                                                                                            |                    | hsa-miR-6811-3p | <i>AGO3, PRKCA, PDE6A, PDE6B</i>                                                                                       |
|                                                                                            |                    | hsa-miR-6840-3p | <i>FZD4, GNG4</i>                                                                                                      |
| Innate immune system (Immune system)                                                       | $1.65 \times 10^5$ | hsa-miR-16-5p   | <i>RAB9B, CAPZA2, MAP3K7, RPS6KA3, UBE2V1, BCL2, IRAK3, KRAS, CD44, GOLG A7, VCL, PYGB, PDXK</i>                       |
|                                                                                            |                    | hsa-miR-6840-3p | <i>GNS, CRK, MLEC, RHOF, GM2A, RAP2B, POLR1D, SIKE1</i>                                                                |
|                                                                                            |                    | hsa-miR-4476    | <i>RAB5B, ACTR2, PSMD11, CFL1, TXNIP, ATOX1, FRK</i>                                                                   |
|                                                                                            |                    | hsa-miR-1909-3p | <i>IRAK4, ATOX1, VCL, NFASC</i>                                                                                        |
|                                                                                            |                    | hsa-miR-6811-3p | <i>PAFAH1B2, CCR2, KLRD1, SVIP</i>                                                                                     |
|                                                                                            |                    | hsa-miR-135b-5p | <i>STAT6, TXNIP</i>                                                                                                    |
|                                                                                            |                    | hsa-miR-5192    | <i>UBE2V1, PKM</i>                                                                                                     |
| Rab regulation of trafficking (Vesicle-mediated transport - Clathrin-mediated endocytosis) | $4.46 \times 10^5$ | hsa-miR-16-5p   | <i>RAB9B, RAB3IP, SBF1, TBC1D14</i>                                                                                    |
|                                                                                            |                    | hsa-miR-6811-3p | <i>RAB13, DENND6B</i>                                                                                                  |
|                                                                                            |                    | hsa-miR-6840-3p | <i>TRAPPC2, TBC1D24</i>                                                                                                |
|                                                                                            |                    | hsa-miR-5192    | <i>TBC1D13</i>                                                                                                         |
|                                                                                            |                    | hsa-miR-135b-5p | <i>RAB3GAP2</i>                                                                                                        |
|                                                                                            |                    | hsa-miR-4476    | <i>RAB5B</i>                                                                                                           |

|                                                                                                        |        |                 |                                                                                                                       |
|--------------------------------------------------------------------------------------------------------|--------|-----------------|-----------------------------------------------------------------------------------------------------------------------|
| Beta-catenin independent Wnt signaling pathway (Signal transduction - Signaling by Wnt)                | 0.0002 | hsa-miR-6811-3p | AGO3,PRKCA,PDE6A,PDE6B,PRICKLE1                                                                                       |
|                                                                                                        |        | hsa-miR-16-5p   | MAP3K7, KRAS                                                                                                          |
|                                                                                                        |        | hsa-miR-4476    | PSMD11, TNRC6B                                                                                                        |
|                                                                                                        |        | hsa-miR-6840-3p | FZD4, GNG4                                                                                                            |
| Cellular responses to external stimuli (Cellular response to stimuli)                                  | 0.0002 | hsa-miR-16-5p   | CAPZA2,DCTN5,VEGFA,RPS6KA3,NUP155,NCOR2,CUL3,ANAPC16,TBL1XR1,RPS24,RPL10,TXN2,HM13,HMGA2,NCOR2,CUL3,TBL1XR1,TXN2,HM13 |
|                                                                                                        |        | hsa-miR-4476    | PSMD11,SOD2,PHC2,TNRC6B,TXNIP,TFDP2,ATOX1                                                                             |
|                                                                                                        |        | hsa-miR-6811-3p | AGO3,ANAPC16,BAG2                                                                                                     |
|                                                                                                        |        | hsa-miR-135b-5p | TXNIP                                                                                                                 |
|                                                                                                        |        | hsa-miR-1909-3p | ATOX1                                                                                                                 |
|                                                                                                        |        | hsa-miR-5192    | SOD2                                                                                                                  |
|                                                                                                        |        | hsa-miR-6840-3p | ACTR1A, RPL28                                                                                                         |
| Adaptive immune system (Immune system)                                                                 | 0.0004 | hsa-miR-16-5p   | DCTN5,KIF2A,RACGAP1,KIF3B,MAP3K7,UBE2V1,CUL3,FBXL20,KRAS,SEC61A1,ANAPC13,TRIM4,UBE3C,CAPZA2                           |
|                                                                                                        |        | hsa-miR-6811-3p | KLHL21,KLRD1,RAET1E                                                                                                   |
|                                                                                                        |        | hsa-miR-6840-3p | ACTR1A,TAP2,RNF14,CD300LG,NCR3LG1,BTN3A2                                                                              |
|                                                                                                        |        | hsa-miR-4476    | PSMD11, RNF111                                                                                                        |
|                                                                                                        |        | hsa-miR-5192    | CALR, UBE2V1                                                                                                          |
|                                                                                                        |        | hsa-miR-1909-3p | CANX                                                                                                                  |
| Golgi to ER retrograde transport (Vesicle-mediated transport - Clathrin-mediated endocytosis)          | 0.0006 | hsa-miR-16-5p   | CAPZA2,KIF2A,RACGAP1,KIF3B,KIF1B,GALNT1, DCTN5                                                                        |
|                                                                                                        |        | hsa-miR-135b-5p | RAB3GAP2                                                                                                              |
|                                                                                                        |        | hsa-miR-6811-3p | PAFAH1B2                                                                                                              |
|                                                                                                        |        | hsa-miR-6840-3p | ACTR1A                                                                                                                |
| Neutrophil degranulation (Immune system - Innate)                                                      | 0.0007 | hsa-miR-16-5p   | RAB9B,CD44,GOLGA7,VCL,PYGB,PDXK                                                                                       |
|                                                                                                        |        | hsa-miR-6840-3p | GNS,MLEC,RHOF,GM2A,RAP2B                                                                                              |
|                                                                                                        |        | hsa-miR-4476    | RAB5B,ACTR2,PSMD11,FRK                                                                                                |
|                                                                                                        |        | hsa-miR-1909-3p | VCL, NFASC                                                                                                            |
|                                                                                                        |        | hsa-miR-6811-3p | PAFAH1B2, SVIP                                                                                                        |
|                                                                                                        |        | hsa-miR-5192    | PKM                                                                                                                   |
| Intra-Golgi and retrograde Golgi to ER trafficking (Vesicle-mediated transport - membrane trafficking) | 0.0007 | hsa-miR-16-5p   | RAB9B,CAPZA2,DCTN5,GALNT1,RAB30,KIF2A,RACGAP1,KIF3B,KIF1B                                                             |
|                                                                                                        |        | hsa-miR-6811-3p | RAB30, PAFAH1B2                                                                                                       |
|                                                                                                        |        | hsa-miR-135b-5p | RAB3GAP2                                                                                                              |
|                                                                                                        |        | hsa-miR-6840-3p | ACTR1A                                                                                                                |
| MAPK family signaling cascades (Signal transduction)                                                   | 0.001  | hsa-miR-16-5p   | CUL3,KRAS,GOLGA7,VCL,FNTA,ARL2                                                                                        |
|                                                                                                        |        | hsa-miR-6840-3p | IL6R,RCE1,SPRED1                                                                                                      |
|                                                                                                        |        | hsa-miR-4476    | PSMD11, TNRC6B                                                                                                        |
|                                                                                                        |        | hsa-miR-5192    | FGFR1, CDC14B                                                                                                         |

|                                                                                                                           |       |                 |                                                                                        |
|---------------------------------------------------------------------------------------------------------------------------|-------|-----------------|----------------------------------------------------------------------------------------|
|                                                                                                                           |       | hsa-miR-6811-3p | AGO3, IGF2BP1                                                                          |
|                                                                                                                           |       | hsa-miR-1909-3p | VCL                                                                                    |
| Cell cycle                                                                                                                | 0.001 | hsa-miR-16-5p   | PPP6R3, RAB3IP, SBF1, KIF2A, BIRC5, NUP155, BRCA1, ANAPC16, CCND2, CHEK1, TAOK1, ORC4, |
|                                                                                                                           |       | hsa-miR-4476    | PSMD11, TFDP2, BUB3, TAOK1, SET                                                        |
|                                                                                                                           |       | hsa-miR-5192    | CSNK1D, E2F6, CCND2                                                                    |
|                                                                                                                           |       | hsa-miR-6811-3p | DENND6B, ANAPC16, PRKCA, SPC24, SPAST                                                  |
|                                                                                                                           |       | hsa-miR-6840-3p | ACTR1A, ARPP19, CTC1                                                                   |
|                                                                                                                           |       | hsa-miR-135b-5p | RAB3GAP2                                                                               |
|                                                                                                                           |       | hsa-miR-4787-5p | CENPO                                                                                  |
| Rab GEFs exchange GTP for GDP on RABs (Vesicle-mediated transport - membrane trafficking - Rab regulation of trafficking) | 0.001 | hsa-miR-16-5p   | RAB9B, RAB3IP, SBF1                                                                    |
|                                                                                                                           |       | hsa-miR-6811-3p | RAB13, DENND6B                                                                         |
|                                                                                                                           |       | hsa-miR-6840-3p | TRAPPC2                                                                                |
|                                                                                                                           |       | hsa-miR-4476    | RAB5B                                                                                  |
|                                                                                                                           |       | hsa-miR-135b-5p | RAB3GAP2                                                                               |
| Signaling by Rho GTPases, Miro GTPases and RHOTB3 (Signal transduction)                                                   | 0.002 | hsa-miR-16-5p   | CUL3, TAOK1, TXNL1, RAB9B, KIF2A, RACGAP1, TFRC, BIRC5                                 |
|                                                                                                                           |       | hsa-miR-4476    | BUB3, TAOK1, DBN1, ACTR2, CFL1                                                         |
|                                                                                                                           |       | hsa-miR-6840-3p | RHOF, ACBD5, ARHGAP11A                                                                 |
|                                                                                                                           |       | hsa-miR-6811-3p | PRKCA, SPC24, EFHD2                                                                    |
|                                                                                                                           |       | hsa-miR-1909-3p | SRGAP1, WDR81                                                                          |
|                                                                                                                           |       | hsa-miR-4787-5p | CENPO                                                                                  |
|                                                                                                                           |       | hsa-miR-5192    | RALBP1                                                                                 |
|                                                                                                                           |       | hsa-miR-135b-5p | NHS                                                                                    |
| Metabolism of RNA                                                                                                         | 0.002 | hsa-miR-16-5p   | NUP155, ZC3H11A, RPS24, RPL10, RCL1, UTP25, RBM28, EIF4B                               |
|                                                                                                                           |       | hsa-miR-6840-3p | RPL28, PRORP, RBM28, DCPS, CDKAL1                                                      |
|                                                                                                                           |       | hsa-miR-4476    | PSMD11, CHTOP, SET, PRORP                                                              |
|                                                                                                                           |       | hsa-miR-5192    | CSNK1D, ZC3H11A, HNRNPUL1                                                              |
|                                                                                                                           |       | hsa-miR-6811-3p | PRKCA, IGF2BP1, EXOSC2, FUS                                                            |
|                                                                                                                           |       | hsa-miR-1909-3p | HNRNPA3                                                                                |
| Signaling by TGFB family members (Signal transduction)                                                                    | 0.002 | hsa-miR-16-5p   | NCOR2, CCNT2, ACVR2A                                                                   |
|                                                                                                                           |       | hsa-miR-4476    | TFDP2, RNF111                                                                          |
|                                                                                                                           |       | hsa-miR-5192    | CBL                                                                                    |
|                                                                                                                           |       | hsa-miR-6840-3p | SKIL                                                                                   |
|                                                                                                                           |       | hsa-miR-135b-5p | ACVR1B                                                                                 |
| COPI-independent Golgi-to-ER retrograde traffic (Vesicle-mediated transport - membrane trafficking)                       | 0.003 | hsa-miR-16-5p   | CAPZA2, DCTN5, GALNT1                                                                  |
|                                                                                                                           |       | hsa-miR-6811-3p | PAFAH1B2                                                                               |
|                                                                                                                           |       | hsa-miR-6840-3p | ACTR1A                                                                                 |
|                                                                                                                           |       | hsa-miR-135b-5p | RAB3GAP2                                                                               |



|                                                                              |       |                 |                                                           |
|------------------------------------------------------------------------------|-------|-----------------|-----------------------------------------------------------|
| Cell cycle_Mitotic<br>(Cell cycle)                                           | 0.003 | hsa-miR-16-5p   | KIF2A,BIRC5,NUP155,ANAPC16,CCND2,TAOK1,ORC4               |
|                                                                              |       | hsa-miR-4476    | PSMD11,TFDP2,BUB3,TAOK1,SET                               |
|                                                                              |       | hsa-miR-6811-3p | ANAPC16,PRKCA,SPC24,SPAST                                 |
|                                                                              |       | hsa-miR-5192    | CSNK1D,E2F6,CCND2                                         |
|                                                                              |       | hsa-miR-4787-5p | CENPO                                                     |
|                                                                              |       | hsa-miR-6840-3p | ACTR1A, ARPP19                                            |
| Signaling by Wnt (Signal transduction)                                       | 0.003 | hsa-miR-6811-3p | AGO3,PRKCA,PDE6A,PDE6B,PRICKLE1                           |
|                                                                              |       | hsa-miR-16-5p   | MAP3K7,CUL3,KRAS                                          |
|                                                                              |       | hsa-miR-4476    | PSMD11,TNRC6B,KREMEN1                                     |
|                                                                              |       | hsa-miR-6840-3p | FZD4,GNG4,PYGO1                                           |
| IL-4 and IL-13 signaling (Immune system cytokine signaling in immune system) | 0.003 | hsa-miR-16-5p   | GALNT1,VEGFA,NUP155,NCOR2,TBL1XR1,CCNT2,TAF15,RPS24,RPL10 |
|                                                                              |       | hsa-miR-135b-5p | STAT6                                                     |
|                                                                              |       | hsa-miR-1909-3p | MCL1                                                      |
|                                                                              |       | hsa-miR-5192    | POU2F1                                                    |
|                                                                              |       | hsa-miR-6840-3p | IL6R                                                      |
| Intracellular signaling by second messengers (Signal transduction)           | 0.005 | hsa-miR-4476    | PSMD11,PHC2,TNRC6B,GATAD2B,HDAC5,FRK                      |
|                                                                              |       | hsa-miR-6811-3p | AGO3, PRKCA                                               |
|                                                                              |       | hsa-miR-6840-3p | MTA3                                                      |
|                                                                              |       | hsa-miR-135b-5p | PIP5K1A                                                   |
|                                                                              |       | hsa-miR-16-5p   | PHLPP2                                                    |
|                                                                              |       | hsa-miR-1909-3p | IRAK4                                                     |
|                                                                              |       | hsa-miR-5192    | FGFR1                                                     |
| Cellular response to chemical stress (Cellular response to stress)           | 0.008 | hsa-miR-16-5p   | NCOR2, CUL3, TBL1XR1, TXN2, HM13                          |
|                                                                              |       | hsa-miR-4476    | PSMD11,SOD2,TXNIP,ATOX1                                   |
|                                                                              |       | hsa-miR-135b-5p | TXNIP                                                     |
|                                                                              |       | hsa-miR-5192    | SOD2                                                      |
|                                                                              |       | hsa-miR-1909-3p | ATOX1                                                     |
| M Phase (Cell cycle)                                                         | 0.009 | hsa-miR-16-5p   | KIF2A,BIRC5,NUP155,ANAPC16,TAOK1                          |
|                                                                              |       | hsa-miR-4476    | PSMD11,BUB3,TAOK1,SET                                     |
|                                                                              |       | hsa-miR-6811-3p | ANAPC16,PRKCA,SPC24,SPAST                                 |
|                                                                              |       | hsa-miR-6840-3p | ACTR1A, ARPP19                                            |
|                                                                              |       | hsa-miR-4787-5p | CENPO                                                     |
|                                                                              |       | hsa-miR-5192    | CSNK1D                                                    |
| Transcriptional activity of SMAD2/SMAD3:SMAD4 heterodimer (Transcription)    | 0.009 | hsa-miR-16-5p   | NCOR2, CCNT2                                              |
|                                                                              |       | hsa-miR-4476    | TFDP2, RNF111                                             |
|                                                                              |       | hsa-miR-6840-3p | SKIL                                                      |
| MHC I-mediated antigen processing and presentation (Immune)                  | 0.01  | hsa-miR-16-5p   | UBE2V1,CUL3,FBXL20,SEC61A1,ANAPC13,TRIM4,UBE3C            |
|                                                                              |       | hsa-miR-4476    | PSMD11, RNF111                                            |
|                                                                              |       | hsa-miR-5192    | CALR, UBE2V1                                              |
|                                                                              |       | hsa-miR-6840-3p | TAP2, RNF14                                               |
|                                                                              |       | hsa-miR-6811-3p | KLHL21                                                    |

|                                                                                                                                                                |      |                 |                                                                   |
|----------------------------------------------------------------------------------------------------------------------------------------------------------------|------|-----------------|-------------------------------------------------------------------|
| system -<br><i>Adaptive)</i>                                                                                                                                   |      | hsa-miR-1909-3p | CANX                                                              |
| Hemostasis                                                                                                                                                     | 0.01 | hsa-miR-6840-3p | CRK,GNG4,IGF1,PDE11A                                              |
|                                                                                                                                                                |      | hsa-miR-16-5p   | BIRC5,VEGFA,BCL2,PIM1                                             |
|                                                                                                                                                                |      | hsa-miR-6811-3p | PRKCA, IGF1, TBXA2R                                               |
|                                                                                                                                                                |      | hsa-miR-4476    | CFL1,SDC4,SLC7A5                                                  |
|                                                                                                                                                                |      | hsa-miR-1909-3p | VCL                                                               |
|                                                                                                                                                                |      | hsa-miR-5192    | FAM3C                                                             |
| NR1H2 and<br>NR1H3-<br>mediated<br>signaling<br>( <i>Signal<br/>transduction -<br/>Signaling by<br/>nuclear<br/>receptors)</i> )                               | 0.01 | hsa-miR-16-5p   | NCOR2, TBL1XR1                                                    |
|                                                                                                                                                                |      | hsa-miR-4476    | TNRC6B                                                            |
|                                                                                                                                                                |      | hsa-miR-6811-3p | AGO3, SCD                                                         |
| Signaling by<br>TGF-beta<br>receptor<br>complex<br>( <i>Signal<br/>transduction -<br/>Signaling by<br/>TGF-beta<br/>family<br/>members)</i> )                  | 0.01 | hsa-miR-16-5p   | NCOR2, CCNT2                                                      |
|                                                                                                                                                                |      | hsa-miR-4476    | TFDP2, RNF111                                                     |
|                                                                                                                                                                |      | hsa-miR-5192    | CBL                                                               |
|                                                                                                                                                                |      | hsa-miR-6840-3p | SKIL                                                              |
| Organelle<br>biogenesis<br>and<br>mainainance                                                                                                                  | 0.01 | hsa-miR-6840-3p | ACTR1A,SSTR3,CEP89,GABPB1,ATP5F1A                                 |
|                                                                                                                                                                |      | hsa-miR-16-5p   | RAB3IP,KIF3B,TBL1XR1,ARL3                                         |
|                                                                                                                                                                |      | hsa-miR-5192    | CSNK1D, SOD2                                                      |
|                                                                                                                                                                |      | hsa-miR-6811-3p | GABPB1                                                            |
|                                                                                                                                                                |      | hsa-miR-4476    | UNC119B                                                           |
| PTEN<br>regulation<br>( <i>Signal<br/>transduction -<br/>intracellular<br/>signaling by<br/>second<br/>messenger -<br/>PIP3 activates<br/>AKT signaling)</i> ) | 0.01 | hsa-miR-4476    | PSMD11,PHC2,TNRC6B,GATAD2B,HDAC5,FRK                              |
|                                                                                                                                                                |      | hsa-miR-6811-3p | AGO3                                                              |
|                                                                                                                                                                |      | hsa-miR-6840-3p | MTA3                                                              |
| Infectious<br>disease<br>( <i>Disease)</i> )                                                                                                                   | 0.01 | hsa-miR-6840-3p | CRK,IL6R,STAT2,GNG4,RPL28,MTA3,VAMP1                              |
|                                                                                                                                                                |      | hsa-miR-16-5p   | GALNT1, VEGFA, NUP155, NCOR2, TBL1XR1, CCNT2, TAF15, RPS24, RPL10 |
|                                                                                                                                                                |      | hsa-miR-4476    | ACTR2,PSMD11,TXNIP,GATAD2B                                        |
|                                                                                                                                                                |      | hsa-miR-5192    | CBL,SYT2,CALR                                                     |
|                                                                                                                                                                |      | hsa-miR-135b-5p | TXNIP                                                             |
|                                                                                                                                                                |      | hsa-miR-1909-3p | CANX                                                              |

|                                                                                                                                    |          |             |                                                                                                                                         |
|------------------------------------------------------------------------------------------------------------------------------------|----------|-------------|-----------------------------------------------------------------------------------------------------------------------------------------|
| Rab regulation of trafficking ( <i>Vesicle-mediated transport - Clathrin-mediated endocytosis</i> )                                | 4.46E-05 | miR-16-5p   | RAB9B, RAB3IP, SBF1, TBC1D14                                                                                                            |
|                                                                                                                                    |          | miR-6811-3p | RAB13, DENND6B                                                                                                                          |
|                                                                                                                                    |          | miR-6840-3p | TRAPPC2, TBC1D24                                                                                                                        |
|                                                                                                                                    |          | miR-5192    | TBC1D13                                                                                                                                 |
|                                                                                                                                    |          | miR-135b-5p | RAB3GAP2                                                                                                                                |
| Beta-catenin independent Wnt signaling pathway ( <i>Signal transduction - Signaling by Wnt</i> )                                   | 0.0002   | miR-6811-3p | AGO3, PRKCA, PDE6A, PDE6B, PRICKLE1                                                                                                     |
|                                                                                                                                    |          | miR-16-5p   | MAP3K7, KRAS                                                                                                                            |
|                                                                                                                                    |          | miR-4476    | PSMD11, TNRC6B                                                                                                                          |
|                                                                                                                                    |          | miR-6840-3p | FZD4, GNG4                                                                                                                              |
| Cellular responses to external stimuli ( <i>Cellular response to stimuli</i> )                                                     | 0.0002   | miR-16-5p   | CAPZA2, DCTN5, VEGFA, RPS6KA3, NUP155, NCOR2, CUL3, ANAPC16, TBL1XR1, RPS24, RPL10, TXN2, HM13, HMGA2, NCOR2, CUL3, TBL1XR1, TXN2, HM13 |
|                                                                                                                                    |          | miR-4476    | PSMD11, SOD2, PHC2, TNRC6B, TXNIP, TFD2, ATOX1                                                                                          |
|                                                                                                                                    |          | miR-6811-3p | AGO3, ANAPC16, BAG2                                                                                                                     |
|                                                                                                                                    |          | miR-135b-5p | TXNIP                                                                                                                                   |
|                                                                                                                                    |          | miR-1909-3p | ATOX1                                                                                                                                   |
|                                                                                                                                    |          | miR-5192    | SOD2                                                                                                                                    |
| Adaptive immune system ( <i>Immune system</i> )                                                                                    | 0.0004   | miR-6840-3p | ACTR1A, RPL28                                                                                                                           |
|                                                                                                                                    |          | miR-16-5p   | DCTN5, KIF2A, RACGAP1, KIF3B, MAP3K7, UBE2V1, CUL3, FBXL20, KRAS, SEC61A1, ANAPC13, TRIM4, UBE3C, CAPZA2                                |
|                                                                                                                                    |          | miR-6811-3p | KLHL21, KLRD1, RAET1E                                                                                                                   |
|                                                                                                                                    |          | miR-6840-3p | ACTR1A, TAP2, RNF14, CD300LG, NCR3LG1, BTN3A2                                                                                           |
|                                                                                                                                    |          | miR-4476    | PSMD11, RNF111                                                                                                                          |
| Golgi to ER retrograde transport ( <i>Vesicle-mediated transport - Clathrin-mediated endocytosis</i> )                             | 0.0006   | miR-5192    | CALR, UBE2V1                                                                                                                            |
|                                                                                                                                    |          | miR-1909-3p | CANX                                                                                                                                    |
|                                                                                                                                    |          | miR-16-5p   | CAPZA2, KIF2A, RACGAP1, KIF3B, KIF1B, GALNT1, DCTN5                                                                                     |
|                                                                                                                                    |          | miR-135b-5p | RAB3GAP2                                                                                                                                |
| Neutrophil degranulation ( <i>Immune system - Innate</i> )                                                                         | 0.0007   | miR-6811-3p | PAFAH1B2                                                                                                                                |
|                                                                                                                                    |          | miR-6840-3p | ACTR1A                                                                                                                                  |
|                                                                                                                                    |          | miR-16-5p   | RAB9B, CD44, GOLGA7, VCL, PYGB, PDXK                                                                                                    |
|                                                                                                                                    |          | miR-6840-3p | GNS, MLEC, RHOF, GM2A, RAP2B                                                                                                            |
|                                                                                                                                    |          | miR-4476    | RAB5B, ACTR2, PSMD11, FRK                                                                                                               |
| Intra-Golgi and retrograde Golgi to ER trafficking ( <i>Vesicle-mediated transport - membrane trafficking</i> )                    | 0.0007   | miR-1909-3p | VCL, NFASC                                                                                                                              |
|                                                                                                                                    |          | miR-6811-3p | PAFAH1B2, SVIP                                                                                                                          |
|                                                                                                                                    |          | miR-5192    | PKM                                                                                                                                     |
|                                                                                                                                    |          | miR-16-5p   | RAB9B, CAPZA2, DCTN5, GALNT1, RAB30, KIF2A, RACGAP1, KIF3B, KIF1B                                                                       |
| MAPK family signaling cascades ( <i>Signal transduction</i> )                                                                      | 0.001    | miR-6811-3p | RAB30, PAFAH1B2                                                                                                                         |
|                                                                                                                                    |          | miR-135b-5p | RAB3GAP2                                                                                                                                |
|                                                                                                                                    |          | miR-6840-3p | ACTR1A                                                                                                                                  |
|                                                                                                                                    |          | miR-16-5p   | CUL3, KRAS, GOLGA7, VCL, FNTA, ARL2                                                                                                     |
|                                                                                                                                    |          | miR-6840-3p | IL6R, RCE1, SPRED1                                                                                                                      |
| Cell cycle                                                                                                                         | 0.001    | miR-4476    | PSMD11, TNRC6B                                                                                                                          |
|                                                                                                                                    |          | miR-5192    | FGFR1, CDC14B                                                                                                                           |
|                                                                                                                                    |          | miR-6811-3p | AGO3, IGF2BP1                                                                                                                           |
|                                                                                                                                    |          | miR-1909-3p | VCL                                                                                                                                     |
|                                                                                                                                    |          | miR-16-5p   | PPP6R3, RAB3IP, SBF1, KIF2A, BIRC5, NUP155, BRCA1, ANAPC16, CCND2, CHEK1, TAOK1, ORC4                                                   |
|                                                                                                                                    |          | miR-4476    | PSMD11, TFD2, BUB3, TAOK1, SET                                                                                                          |
| Rab GEFs exchange GTP for GDP on RABs ( <i>Vesicle-mediated transport - membrane trafficking - Rab regulation of trafficking</i> ) | 0.001    | miR-5192    | CSNK1D, E2F6, CCND2                                                                                                                     |
|                                                                                                                                    |          | miR-6811-3p | DENND6B, ANAPC16, PRKCA, SPC24, SPAST                                                                                                   |
|                                                                                                                                    |          | miR-6840-3p | ACTR1A, ARPP19, CTC1                                                                                                                    |
|                                                                                                                                    |          | miR-135b-5p | RAB3GAP2                                                                                                                                |
|                                                                                                                                    |          | miR-4787-5p | CENPO                                                                                                                                   |
| Signaling by Rho GTPases, Miro GTPases and RHOBTB3 ( <i>Signal transduction</i> )                                                  | 0.002    | miR-16-5p   | RAB9B, RAB3IP, SBF1                                                                                                                     |
|                                                                                                                                    |          | miR-6811-3p | RAB13, DENND6B                                                                                                                          |
|                                                                                                                                    |          | miR-6840-3p | TRAPPC2                                                                                                                                 |
|                                                                                                                                    |          | miR-4476    | RAB5B                                                                                                                                   |
|                                                                                                                                    |          | miR-135b-5p | RAB3GAP2                                                                                                                                |
|                                                                                                                                    |          | miR-16-5p   | CUL3, TAOK1, TXNL1, RAB9B, KIF2A, RACGAP1, TFRC, BIRC5                                                                                  |
|                                                                                                                                    |          | miR-4476    | BUB3, TAOK1, DBN1, ACTR2, CFL1                                                                                                          |
|                                                                                                                                    | 0.002    | miR-6840-3p | RHOF, ACBD5, ARHGAP11A                                                                                                                  |
|                                                                                                                                    |          | miR-6811-3p | PRKCA, SPC24, EFHD2                                                                                                                     |
|                                                                                                                                    |          | miR-1909-3p | SRGAP1, WDR81                                                                                                                           |
|                                                                                                                                    |          | miR-4787-5p | CENPO                                                                                                                                   |
|                                                                                                                                    |          | miR-5192    | RALBP1                                                                                                                                  |
|                                                                                                                                    |          | miR-135b-5p | NHS                                                                                                                                     |

|                                                                                                           |       |             |                                                           |
|-----------------------------------------------------------------------------------------------------------|-------|-------------|-----------------------------------------------------------|
| Metabolism of RNA                                                                                         | 0.002 | miR-16-5p   | NUP155,ZC3H11A,RPS24,RPL10,RCL1,UTP25,RBM28,EIF4B         |
|                                                                                                           |       | miR-6840-3p | RPL28,PRORP,RBM28,DCPS,CDKAL1                             |
|                                                                                                           |       | miR-4476    | PSMD11,CHTOP,SET,PRORP                                    |
|                                                                                                           |       | miR-5192    | CSNK1D,ZC3H11A,HNRNPUL1                                   |
|                                                                                                           |       | miR-6811-3p | PRKCA,IGF2BP1,EXOSC2,FUS                                  |
|                                                                                                           |       | miR-1909-3p | HNRNPA3                                                   |
| Signaling by TGFβ family members<br>(Signal transduction)                                                 | 0.002 | miR-16-5p   | NCOR2,CCNT2,ACVR2A                                        |
|                                                                                                           |       | miR-4476    | TFDP2, RNF111                                             |
|                                                                                                           |       | miR-5192    | CBL                                                       |
|                                                                                                           |       | miR-6840-3p | SKIL                                                      |
|                                                                                                           |       | miR-135b-5p | ACVR1B                                                    |
| COPI-independent Golgi-to-ER<br>retrograde traffic (Vesicle-mediated<br>transport - membrane trafficking) | 0.003 | miR-16-5p   | CAPZA2,DCTN5,GALNT1                                       |
|                                                                                                           |       | miR-6811-3p | PAFAH1B2                                                  |
|                                                                                                           |       | miR-6840-3p | ACTR1A                                                    |
|                                                                                                           |       | miR-135b-5p | RAB3GAP2                                                  |
| Cell cycle_Mitotic (Cell cycle)                                                                           | 0.003 | miR-16-5p   | KIF2A,BIRC5,NUP155,ANAPC16,CCND2,TAOK1,ORC4               |
|                                                                                                           |       | miR-4476    | PSMD11,TFDP2,BUB3,TAOK1,SET                               |
|                                                                                                           |       | miR-6811-3p | ANAPC16,PRKCA,SPC24,SPAST                                 |
|                                                                                                           |       | miR-5192    | CSNK1D,E2F6,CCND2                                         |
|                                                                                                           |       | miR-4787-5p | CENPO                                                     |
|                                                                                                           |       | miR-6840-3p | ACTR1A, ARPP19                                            |
| Signaling by Wnt (Signal transduction)                                                                    | 0.003 | miR-6811-3p | AGO3,PRKCA,PDE6A,PDE6B,PRICKLE1                           |
|                                                                                                           |       | miR-16-5p   | MAP3K7,CUL3,KRAS                                          |
|                                                                                                           |       | miR-4476    | PSMD11,TNRC6B,KREMEN1                                     |
|                                                                                                           |       | miR-6840-3p | FZD4,GNG4,PYGO1                                           |
| IL-4 and IL-13 signaling (Immune<br>system - cytokine signaling in immune<br>system)                      | 0.003 | miR-16-5p   | GALNT1,VEGFA,NUP155,NCOR2,TBL1XR1,CCNT2,TAF15,RPS24,RPL10 |
|                                                                                                           |       | miR-135b-5p | STAT6                                                     |
|                                                                                                           |       | miR-1909-3p | MCL1                                                      |
|                                                                                                           |       | miR-5192    | POU2F1                                                    |
|                                                                                                           |       | miR-6840-3p | IL6R                                                      |
| Intracellular signaling by second<br>messengers (Signal transduction)                                     | 0.005 | miR-4476    | PSMD11,PHC2,TNRC6B,GATAD2B,HDAC5,FRK                      |
|                                                                                                           |       | miR-6811-3p | AGO3, PRKCA                                               |
|                                                                                                           |       | miR-6840-3p | MTA3                                                      |
|                                                                                                           |       | miR-135b-5p | PIP5K1A                                                   |
|                                                                                                           |       | miR-16-5p   | PHLPP2                                                    |
|                                                                                                           |       | miR-1909-3p | IRAK4                                                     |
|                                                                                                           |       | miR-5192    | FGFR1                                                     |
| Cellular response to chemical stress<br>(Cellular response to stress)                                     | 0.008 | miR-16-5p   | NCOR2, CUL3, TBL1XR1, TXN2, HM13                          |
|                                                                                                           |       | miR-4476    | PSMD11,SOD2,TXNIP,ATOX1                                   |
|                                                                                                           |       | miR-135b-5p | TXNIP                                                     |
|                                                                                                           |       | miR-5192    | SOD2                                                      |
|                                                                                                           |       | miR-1909-3p | ATOX1                                                     |
| M Phase (Cell cycle)                                                                                      | 0.009 | miR-16-5p   | KIF2A,BIRC5,NUP155,ANAPC16,TAOK1                          |
|                                                                                                           |       | miR-4476    | PSMD11,BUB3,TAOK1,SET                                     |
|                                                                                                           |       | miR-6811-3p | ANAPC16,PRKCA,SPC24,SPAST                                 |
|                                                                                                           |       | miR-6840-3p | ACTR1A, ARPP19                                            |
|                                                                                                           |       | miR-4787-5p | CENPO                                                     |
|                                                                                                           |       | miR-5192    | CSNK1D                                                    |
| Transcriptional activity of<br>SMAD2/SMAD3:SMAD4 heterodimer<br>(Transcription)                           | 0.009 | miR-16-5p   | NCOR2, CCNT2                                              |
|                                                                                                           |       | miR-4476    | TFDP2, RNF111                                             |
|                                                                                                           |       | miR-6840-3p | SKIL                                                      |
| MHC I-mediated antigen processing<br>and presentation (Immune system -<br>Adaptive)                       | 0.01  | miR-16-5p   | UBE2V1,CUL3,FBXL20,SEC61A1,ANAPC13,TRIM4,UBE3C            |
|                                                                                                           |       | miR-4476    | PSMD11, RNF111                                            |
|                                                                                                           |       | miR-5192    | CALR, UBE2V1                                              |
|                                                                                                           |       | miR-6840-3p | TAP2, RNF14                                               |
|                                                                                                           |       | miR-6811-3p | KLHL21                                                    |
|                                                                                                           |       | miR-1909-3p | CANX                                                      |
| Hemostasis                                                                                                | 0.01  | miR-6840-3p | CRK,GNG4,IGF1,PDE11A                                      |
|                                                                                                           |       | miR-16-5p   | BIRC5,VEGFA,BCL2,PIM1                                     |
|                                                                                                           |       | miR-6811-3p | PRKCA, IGF1, TBXA2R                                       |
|                                                                                                           |       | miR-4476    | CFL1,SDC4,SLC7A5                                          |
|                                                                                                           |       | miR-1909-3p | VCL                                                       |
|                                                                                                           |       | miR-5192    | FAM3C                                                     |

|                                                                                                          |      |             |                                                                   |
|----------------------------------------------------------------------------------------------------------|------|-------------|-------------------------------------------------------------------|
| NR1H2 and NR1H3-mediated signaling<br>(Signal transduction - Signaling by nuclear receptors)             | 0.01 | miR-16-5p   | NCOR2, TBL1XR1                                                    |
|                                                                                                          |      | miR-4476    | TNRC6B                                                            |
|                                                                                                          |      | miR-6811-3p | AGO3, SCD                                                         |
| Signaling by TGF-beta receptor complex (Signal transduction - Signaling by TGF-beta family members)      | 0.01 | miR-16-5p   | NCOR2, CCNT2                                                      |
|                                                                                                          |      | miR-4476    | TFDP2, RNF111                                                     |
|                                                                                                          |      | miR-5192    | CBL                                                               |
| Organelle biogenesis and maintenance                                                                     | 0.01 | miR-6840-3p | SKIL                                                              |
|                                                                                                          |      | miR-6840-3p | ACTR1A, SSTR3, CEP89, GABPB1, ATP5F1A                             |
|                                                                                                          |      | miR-16-5p   | RAB3IP, KIF3B, TBL1XR1, ARL3                                      |
|                                                                                                          |      | miR-5192    | CSNK1D, SOD2                                                      |
|                                                                                                          |      | miR-6811-3p | GABPB1                                                            |
| PTEN regulation (Signal transduction - intracellular signaling by second messenger - PIP3 activates AKT) | 0.01 | miR-4476    | UNC119B                                                           |
|                                                                                                          |      | miR-4476    | PSMD11, PHC2, TNRC6B, GATAD2B, HDAC5, FRK                         |
|                                                                                                          |      | miR-6811-3p | AGO3                                                              |
| Infectious disease (Disease)                                                                             | 0.01 | miR-6840-3p | MTA3                                                              |
|                                                                                                          |      | miR-6840-3p | CRK, IL6R, STAT2, GNG4, RPL28, MTA3, VAMP1                        |
|                                                                                                          |      | miR-16-5p   | GALNT1, VEGFA, NUP155, NCOR2, TBL1XR1, CCNT2, TAF15, RPS24, RPL10 |
|                                                                                                          |      | miR-4476    | ACTR2, PSMD11, TXNIP, GATAD2B                                     |
|                                                                                                          |      | miR-5192    | CBL, SYT2, CALR                                                   |
|                                                                                                          |      | miR-135b-5p | TXNIP                                                             |
|                                                                                                          |      | miR-1909-3p | CANX                                                              |
